1 **The SARS-CoV-2 infection in Thailand: analysis of spike**  
2 **variants complemented by protein structure insights**

3

4 **Sirawit Ittisoponpisan<sup>\*a</sup>, Shalip Yahangkiakan<sup>a</sup>, Michael J E Sternberg<sup>b</sup>, and Alessia David<sup>b</sup>**

5 <sup>a</sup>Center for Genomics and Bioinformatics Research, Division of Biological Science, Faculty of Science, Prince  
6 of Songkla University, Songkhla, 90110, Thailand

7 <sup>b</sup>Structural Bioinformatics Group, Centre for Integrative Systems Biology and Bioinformatics, Department of  
8 Life Sciences, Sir Ernst Chain Building, Imperial College London, London SW7 2AZ, UK

9 \*corresponding author: [sirawit.i@psu.ac.th](mailto:sirawit.i@psu.ac.th), tel: +66-7428-8797

10

11

12

## 13 **Abstract**

14 Thailand was the first country outside China to officially report COVID-19 cases. Despite the  
15 strict regulations for international arrivals, up until February 2021, Thailand had been hit by two major  
16 outbreaks. With a large number of SARS-CoV-2 sequences collected from patients, the effects of many  
17 genetic variations, especially those unique to Thai strains, are yet to be elucidated. In this study, we  
18 analysed 439,197 sequences of the SARS-CoV-2 spike protein collected from NCBI and GISAID  
19 databases. 595 sequences were from Thailand and contained 52 variants, of which 6 had not been  
20 observed outside Thailand (p.T51N, p.P57T, p.I68R, p.S205T, p.K278T, p.G832C). These variants  
21 were not predicted to be of concern. We demonstrate that the p.D614G, although already present during  
22 the first Thai outbreak, became the prevalent strain during the second outbreak, similarly to what was  
23 described in other countries. Moreover, we show that the most common variants detected in Thailand  
24 (p.A829T, p.S459F and p.S939F) do not appear to cause any major structural change to the spike trimer  
25 or the spike-ACE2 interaction. Among the variants identified in Thailand was p.N501T. This variant,  
26 which involves an asparagine critical for spike-ACE2 binding, was not predicted to increase SARS-  
27 CoV-2 binding, thus in contrast to the variant of global concern p.N501Y. In conclusion, novel variants  
28 identified in Thailand are unlikely to increase the fitness of SARS-CoV-2. The insights obtained from  
29 this study could aid SARS-CoV-2 variants prioritisations and help molecular biologists and virologists  
30 working on strain surveillance.

31

32 **Keywords:** SARS-CoV-2, variant analysis, Angiotensin-converting enzyme 2, spike protein,

33 Thailand

34

## 35 **Introduction**

36 In January 2020, Thailand became the first country outside China to officially report a COVID-  
37 19 case [1]. The local transmissions later developed into the first wave in March 2020, resulting in a  
38 declaration of a state of emergency, followed by a lockdown nationwide [2]. As part of the new  
39 regulations aiming to contain the outbreak, many international flights were banned, and individuals  
40 arriving in Thailand from overseas were required to stay in a 14-day state quarantine for monitoring  
41 before being released [3], rendering Thailand into virtual isolation. The lockdown was extensively lifted  
42 in July 2020 as no local transmission had been reported for over a month, flattening the infection tally  
43 to about 3,000 cases [4, 5]. However, citizens were still strongly advised to follow the "new normal"  
44 lifestyle of wearing face masks and maintaining social distancing in public areas.

45 Despite the government's strict travel regulations in an effort to control cross-border  
46 transmission, there had been reports of local transmission cases due to illegal border crossing and not  
47 complying with the 14 day-quarantine measure, importing new strains from abroad [6–8]. In December  
48 2020, the second wave of infection occurred among Burmese workers in a seafood market in Samut  
49 Sakhon province located to the southwest of Bangkok. It later quickly spread to the surrounding  
50 provinces [9]. As of February 2021, there had been reports of over 20,000 COVID-19 cases in Thailand  
51 and over a hundred million cases worldwide [10].

52 The rapid growth in COVID-19 cases worldwide and the global sequencing efforts resulted in  
53 a large number of viral sequences being collected from patients. Many of these have been made freely  
54 available through two major databases: NCBI (<https://www.ncbi.nlm.nih.gov/sars-cov-2/>) and GISAID  
55 (<https://www.gisaid.org/>) [11]. At the time of this study, over 600,000 SARS-CoV-2 sequences were  
56 available for analysis.

57 The spike protein is one of the most widely studied proteins of SARS-CoV-2 as it interacts with  
58 the human ACE2 (hACE2), thus facilitating viral cell entry [12, 13]. Analysis of the 3D structure of the  
59 spike protein, alone and bound to hACE2, can help researchers understand SARS-CoV-2 evolution and  
60 transmission and could guide therapeutic research [14]. To date, most of the analyses have been

61 performed on variants of global concern identified in Europe, America and Africa, where the infections  
62 were severe and the fatality rates high [15–17]. However, studies on the effect of variants identified in  
63 Thailand are limited [18–21].

64 In this study, we aim to provide structural insights into SARS-CoV-2 spike variants identified  
65 in Thailand to obtain insights into SARS-CoV-2 Thai outbreaks and identify variants of interest which  
66 may require additional investigations.

67

## 68 **Methods**

### 69 SARS-CoV2 spike protein sequences

70           The spike protein sequences were retrieved on 7 February 2021 from two databases: NCBI  
71 (<https://www.ncbi.nlm.nih.gov/sars-cov-2/>) and GISAID (<https://www.gisaid.org/>) [11]. All sequences  
72 that were 1,273 amino acids long, which is the same length as the original and canonical Wuhan  
73 reference sequence (YP\_009724390.1), were selected from these databases. As a result, 53,056 spike  
74 protein sequences from NCBI (including the reference YP\_009724390.1) and 386,176 sequences from  
75 GISAID were retrieved. The sequences were then further screened by comparing them with the Wuhan  
76 reference sequence (YP\_009724390.1). Any sequence that resulted in less than 98% identity or more  
77 than three consecutive amino acid variants were removed from the dataset. This is to eliminate the  
78 possibility of the sequence containing insertion/deletion mutations. From these criteria, six sequences  
79 from NCBI and 29 sequences from GISAID were removed. The final dataset consisted of 53,050  
80 sequences from NCBI and 386,147 from GISAID (439,197 total).

81

82

### 83 Phylogenetic analysis

84           The phylogenetic tree was generated using the Nextstrain web server [22]. The tree was created  
85 based on the whole genome alignment of SARS-CoV-2 strains available on the GISAID database and  
86 was customised to cover only strains collected in Thailand from 20 December 2019 to 7 February 2021  
87 [23]. As Nextstrain only displays complete strains on a fixed timeline, some variants could not be mapped  
88 directly onto this tree due to incomplete strain information (i.e., the strain might be partially sequenced,  
89 or the date of collection was unclear). Therefore, the locations of some of these variants were estimated  
90 based on their clade information and co-existing variants on the strain.

91

92

93 Structural analysis

94           The following 3D coordinate files were extracted from the ProteinDataBank and used for  
95 variant analysis: 6XR8 (resolution: 2.90 Å, released: 2020-07-22) for the complete structure of the  
96 SARS-CoV-2 spike protein complex (at inactive conformation) and 6M0J (resolution: 2.45 Å, released:  
97 2020-03-18) for the spike-hACE2 complex. The accessible surface area (ASA) calculation was  
98 performed using DSSP [24]. For each amino acid, the RSA was calculated using the formula  $RSA =$   
99  $ASA/\max ASA$ . The maxASA for each amino acid is defined according to Rost and Sander [25]. A  
100 residue was regarded as "surface residue" when its relative solvent accessibility (RSA) was  $\geq 9\%$ ,  
101 otherwise "buried". A residue was defined as an "interface" if within 4 Angstrom distance from any  
102 other residues of a different chain [26, 27]. In this study, interface residue calculation was performed  
103 on the trimer spike protein complex (PDB: 6XR8) and the spike-hACE2 complex (PDB: 6M0J). Full  
104 details of surface and interface residues are provided in Supplementary File 1.

105           Variants occurring in the SARS-CoV-2 spike were identified by comparing 439,196 sequences  
106 in our dataset against the Wuhan SARS-CoV-2 spike reference sequence (YP\_009724390). The in silico  
107 mutagenesis was performed using a modified version of the Missense 3D algorithm [28] to account for  
108 amino acid substitutions at interface residues.

109

110

## 111 **Results**

### 112 **Phylogenetic analysis of variants found in Thailand**

113 A total of 439,197 SARS-CoV-2 spike sequences were collected and analysed. 595 sequences  
114 were from Thailand and contained 52 spike variants. Forty-one of these variants could be mapped onto  
115 a phylogenetic tree (Figure 1). Two major clusters of strains from the first and second SARS-CoV-2  
116 Thai outbreaks were identified. The first outbreak contained variants from seven clades of SARS-CoV-  
117 2 strains. Although the variant of global concern p.D614G was already detected in many strains since  
118 March 2020, it became the prevalent strain in the second outbreak (clade GH, Figure 1).

119 Six SARS-CoV-2 spike variants, p.T51N, p.P57T, p.I68R, p.S205T, p.K278T, p.G832C, were  
120 unique to Thai strains and not identified in genetic sequences from other countries. Notably, three  
121 variants (p.I68R, p.S205T, and p.G832C) were found during the first outbreak, and one (p.K278T) was  
122 found during the second outbreak. The other two Thailand-specific variants (p.T51N and p.P57T),  
123 which co-localized in one genomic sequence, could not be mapped onto the phylogenetic tree (ID:  
124 708814, clade: GH, collected on 9 October 2020). This strain had a total of 11 variants: eight of them –  
125 p.V47A, p.T51N, p.Q52K, p.F55L, p.P57T, p.V70L, p.S71P, and p.A688P - were not shared by any  
126 other Thai strains. When the whole genome of this record was used in a BLAST search against SARS-  
127 CoV-2 records on the GISAID web server, similar strains were found mainly in samples from Saudi  
128 Arabia (data not shown). This suggests that this strain was not a result of local transmission but may  
129 have been introduced into Thailand from overseas and later mutated to contain the two unique variants  
130 p.T51N and p.P57T.

131

### 132 **Analysis of variants found in Thailand**

133 We first analysed the distribution of all variants identified in the spike protein by using the  
134 entire dataset of 439,197 SARS-CoV-2 spike sequences. On average, each spike sequence had 2.7  
135 variants (min: 0, max: 23, median: 3, STD: 1.17) (see Supplementary File 2). Variants were distributed

136 ubiquitously on the spike amino acid sequence, with the exception of 51 residues which did not contain  
137 any variants. These residues are part of the receptor-binding (RBD) and Corona S2 superfamily (S2)  
138 domains (Supplementary Figure 1 and Supplementary File 3-4).

139         We next focused on the six variants uniquely identified in Thailand (see Table 1 and Figure 2).  
140 No structural changes to the spike trimer and the spike-hACE2 interaction were identified with the  
141 exception of p.S205T, which was predicted to reduce the structural stability of the spike protein due to  
142 drastic reduction of a surface cavity. Cavity alteration has been shown to affect protein stability [14–  
143 16]. Hence, it is likely that this variant is deleterious to the virus. Recently, p.I68R was discovered in a  
144 mutagenesis study of SARS-CoV-2 strains in mice and reported to be associated with the virus's ability  
145 to escape neutralising antibodies [29]. However, whether this variant enhances the viral escape  
146 mechanism in humans is yet to be elucidated. Despite no structural damage found from p.K278T, the  
147 extra h-bond formed between the main chain of Thr278 and the side chain of Thr286 was due to the  
148 side chain repacking of Thr286 rather than the mutation from Lys278 to Thr278. Nevertheless, the fact  
149 that all of the six Thailand-specific variants were rare (found in < 1% of the samples collected) could  
150 imply that they are unlikely to enhance the virus's transmissibility. We next examined additional  
151 variants identified in Thailand (the full structural analysis of the 52 spike variants found in Thailand is  
152 provided in Supplementary Table 1). p.D614G was identified in 48.7% of all sequences analysed. This  
153 variant was predicted to cause the loss of inter-chains H-bonds between aspartic acid 614 and lysines  
154 835 and 854 in the spike trimer, which could affect the spike trimer packing. A study by Yurkovetskiy  
155 et al. using cryo-electron microscopy, indeed, confirms that p.D614G disrupts an interprotomer contact,  
156 thus facilitating the spike "open conformation" [16, 30]. This variant is estimated to increase the  
157 transmissibility of SARS-CoV-2 by 20% [31], thus explaining why, although identified in few samples  
158 in March 2020 (first Thai outbreak) before a strict lockdown measure was enforced, it had become the  
159 dominant strain by February 2021 (second Thai outbreak), similarly to what was observed in other  
160 South East Asian countries [32, 33]. The higher transmissibility of p.D614G can also explain the higher  
161 number of SARS-CoV-2 positive cases in the second compared to the first Thai outbreak.



162           The other most common variants identified in Thailand were p.A829T (39.2% of all sequences),  
163 p.S459F (20.2%), p.L5F (4.7%), p.S939F (2.0%) and p. N501T (1.5%). p.A829T was the prevalent  
164 SARS-CoV-2 variant during the first Thai outbreak, but it was no longer detected in the second  
165 outbreak. No clear structural damage was identified by our analysis. Variant p.S459F was predicted to  
166 disrupt an H-bond formed within surface residues (an H-bond linking Arg457 and Ser459 was disrupted  
167 when the variant was simulated on PDB 6XR8, while a disruption of an H-bond formed between two  
168 consecutive residues Ser459 and Asn460 was detected when tested on PDB 4M0J), which is likely to  
169 be compensated by the interaction with nearby water molecules and therefore not structurally  
170 destabilising. Variant p.L5F was a newly emerging variant in the second Thai outbreak. It is located  
171 near the N-terminal of the spike protein. Unfortunately, this residue was not covered by the available  
172 3D coordinates and no structural analysis could be performed. Variant p.S939F was not predicted to  
173 affect the structure of the spike trimer or its interaction with ACE2. Accordingly, a previous study  
174 suggested that this variant is not likely to enhance SARS-CoV-2 infectivity [34].

175           Variant p. N501T was the only amino acid substitution occurring at the interface between spike  
176 and the hACE2. Asparagine 501 is a critical residue involved in the stabilization of lysine 353, one of  
177 the two critical lysines involved in spike-hACE2 interaction [35]. Indeed, asparagine 501 harbors the  
178 variant of concern p.N501Y, which has been proposed to enhance spike-hACE2 affinity through the  
179 introduction of new hydrogen bonds between tyrosine 501 on the spike protein and residues on the  
180 hACE2 [17, 36, 37]. We analysed the structural consequences of p.N501T and did not observe major  
181 structural changes. Indeed, an in vitro study showed this variant may cause a reduction in spike-hACE2  
182 binding affinity [35].

## 183 Discussion

184           At the time of this study, limited information was available on variants identified in Thailand  
185 during the two major SARS-CoV-2 outbreaks. Our phylogenetic analysis shows how the variant of  
186 global concern p.D614G already present in March 2020 became the dominant strain during the second  
187 Thai outbreak in late December 2020 - February 2021. This variant was detected in the majority of the  
188 strains collected from the seafood market [38, 39]. Found predominantly in Europe, this spike protein  
189 variant has been shown to have a higher transmissibility rate compared to the original Wuhan strain  
190 [31, 40]. The screening of variants present in Thailand also identified variant p.N501T. Asparagine 501  
191 is a critical residue for spike-hACE2, and its substitution to tyrosine is a variant of concern. However,  
192 our analysis did not suggest that the asparagine to threonine substitution may cause any major structural  
193 change. Our results are supported by the in vitro analysis performed by Shang et al. <sup>(2020b)</sup>, which did  
194 not show an increased spike-hACE2 binding affinity.

195           Interestingly, despite analysing nearly 500,000 sequences, some residues in the SARS-CoV-2  
196 spike protein did not contain any variant. Many of these highly conserved residues are clustered in the  
197 receptor-binding domain, which binds to the human ACE2 and triggers host cell invasion [12, 13, 35],  
198 and the Coronavirus S2 domain, which mediates viral cell membrane fusion [41]. The lack of variants  
199 in these regions may suggest biological importance of those particular residues on protein folding and/or  
200 interaction. As genetic variations are usually maintained by natural selection, any alteration on these  
201 highly conserved residues could be deleterious to the survival of the virus. Conserved domains and  
202 residues could therefore serve as biomarkers [42] or promising drug targets against SARS-CoV-2 [41,  
203 43].

204           One limitation in this study is that the Thai sequences available on NCBI and GISAID were  
205 from two sources: the state quarantines and domestic hospitals/research institutions. The strains  
206 collected in the state quarantine zones are likely imported in Thailand and less likely to cause local  
207 transmission. Unfortunately, the available data did not allow to distinguish the variant source. Hence,  
208 the number of variants found in Thailand in this study could be an overestimation of the variants that

209 actually caused local transmissions. Nevertheless, it is always important to keep tracking of possible  
210 new strains as the mutation rate is very high in single-stranded RNA viruses compared to DNA viruses  
211 [44]. The high mutation rate poses a great challenge for developing vaccines [45], highlighting why  
212 incorporating conserved residue information into structural analyses could be essential for discovering  
213 other alternative measures for COVID-19 diagnosis, treatment, and prevention.

214 Another limitation is that at the time of this study only the 3D coordinates of the spike trimer  
215 and the spike- hACE2 interaction were available. Recently, the spike protein was reported to bind to  
216 other human proteins, such as CD209 [46], HAVCR1 [47], and NRP1 [48, 49], and other mammal  
217 proteins [50]. Therefore, in this study, the number of interface residues could have been underestimated,  
218 and it is possible that in the future, additional variants will be classified according to their effect on  
219 additional virus-host interaction. It is well established that interface residues are hot spots for disease  
220 variants [51–53]. The p.N501Y is an example that shows how viral variants occurring at protein  
221 interface could increase viral transmissibility and highlights that any SARS-CoV-2 variant occurring at  
222 the spike trimer interface or spike-hACE2 interface should be carefully analysed.

223

## 224 **Conclusions**

225 In this study, we explored the structural effect of SARS-CoV-2 spike variants identified in  
226 Thailand, highlighting how the second Thai outbreak was likely caused by the variant of global concern  
227 p.D614G. Additionally, we highlighted highly conserved residues on the spike protein, which could  
228 have implications for the development of biomarkers or drug targets. The insights obtained from this  
229 study could aid SARS-CoV-2 variants prioritisations and help molecular biologists and virologists  
230 working on strain surveillance

231

232

233 **Declarations**

234 **Availability of data and materials**

235 The spike protein sequences from NCBI are available at ([https://www.ncbi.nlm.nih.gov/sars-](https://www.ncbi.nlm.nih.gov/sars-cov-2/)  
236 [cov-2/](https://www.ncbi.nlm.nih.gov/sars-cov-2/)). The GISAID spike protein sequences are available to registered users at  
237 (<https://www.gisaid.org/>). The three-dimensional structures for the Sars-Co-V2 are available from the  
238 ProteinDataBank at <https://www.rcsb.org>. All data generated or analysed during this study are included  
239 in this published article and its supplementary information files.

240 **Conflict of interest**

241 The authors declare that they have no competing interests.

242 **Funding**

243 This research was funded in whole, or in part, by the Wellcome Trust [Grant numbers  
244 104955/Z/14/Z and 218242/Z/19/Z]. For the purpose of open access, the author has applied a CC BY  
245 public copyright licence to any Author Accepted Manuscript version arising from this submission. This  
246 Funder had no role in the conceptualization, design, data collection, analysis, decision to publish or  
247 preparation of the manuscript.

248 **Authors' Contribution**

249 SI conceptualised and designed the main methodology. SY performed data curation and  
250 investigation. SI conducted the analysis and wrote the manuscript. AD reviewed the original draft. All  
251 authors have read and agreed to the published version of the manuscript.

252

253 **References**

- 254 [1] WHO. WHO Timeline COVID-19 <https://www.who.int/news/item/27-04-2020-who-timeline---covid-19> (accessed Apr 23, 2021).
- 255 [2] WHO Thailand. WHO Thailand situation report - 41 [https://www.who.int/docs/default-source/searo/thailand/2020-04-3-tha-sitrep-](https://www.who.int/docs/default-source/searo/thailand/2020-04-3-tha-sitrep-41-covid19-final.pdf?sfvrsn=9e14aebc_0.pdf)  
256 [41-covid19-final.pdf?sfvrsn=9e14aebc\\_0.pdf](https://www.who.int/docs/default-source/searo/thailand/2020-04-3-tha-sitrep-41-covid19-final.pdf?sfvrsn=9e14aebc_0.pdf) (accessed Apr 23, 2021).

- 257 [3] Department of Disease Control. Measures to control COVID-19 Version 5 updated on 2 April 2020  
258 [https://ddc.moph.go.th/viralpneumonia/eng/file/main/Measures\\_for\\_travellers\\_from\\_aboard\\_v5.pdf](https://ddc.moph.go.th/viralpneumonia/eng/file/main/Measures_for_travellers_from_aboard_v5.pdf) (accessed Apr 23, 2021).
- 259 [4] Department of Disease Control. Special Announcement of COVID-19 On 1 July 2020  
260 [https://ddc.moph.go.th/viralpneumonia/eng/file/news/news\\_no157\\_010763.pdf](https://ddc.moph.go.th/viralpneumonia/eng/file/news/news_no157_010763.pdf) (accessed Apr 23, 2021).
- 261 [5] WHO Thailand. WHO Thailand situation report - 95 [https://www.who.int/docs/default-source/searo/thailand/2020-07-06-tha-sitrep-95-covid19.pdf?sfvrsn=272b28fd\\_2](https://www.who.int/docs/default-source/searo/thailand/2020-07-06-tha-sitrep-95-covid19.pdf?sfvrsn=272b28fd_2) (accessed Apr 23, 2021).
- 262
- 263 [6] Department of Disease Control. Thailand situation update on 22 November 2020  
264 <https://ddc.moph.go.th/viralpneumonia/eng/file/situation/situation-no322-221163.pdf> (accessed Apr 24, 2021).
- 265 [7] Department of Disease Control. Thailand situation update on 28 November 2020  
266 <https://ddc.moph.go.th/viralpneumonia/eng/file/situation/situation-no328-281163.pdf> (accessed Apr 24, 2021).
- 267 [8] Department of Disease Control. Thailand situation update on 3 December 2020  
268 <https://ddc.moph.go.th/viralpneumonia/eng/file/situation/situation-no333-031263.pdf> (accessed Apr 24, 2021).
- 269 [9] WHO Thailand. WHO Thailand situation report - 102 [https://cdn.who.int/media/docs/default-source/searo/thailand/2020\\_12\\_21\\_tha-sitrep-102-covid19\\_r02.pdf?sfvrsn=7e62038c\\_7&Status=Master](https://cdn.who.int/media/docs/default-source/searo/thailand/2020_12_21_tha-sitrep-102-covid19_r02.pdf?sfvrsn=7e62038c_7&Status=Master) (accessed Apr 24, 2021).
- 270
- 271 [10] Worldometers.info. COVID-19 Coronavirus Pandemix <https://www.worldometers.info/coronavirus/> (accessed Apr 2, 2021).
- 272 [11] Bogner, P.; Capua, I.; Cox, N. J.; Lipman, D. J. A Global Initiative on Sharing Avian Flu Data [1]. *Nature*. Nature Publishing Group August 31, 2006, p 981. <https://doi.org/10.1038/442981a>.
- 273
- 274 [12] Lan, J.; Ge, J.; Yu, J.; Shan, S.; Zhou, H.; Fan, S.; Zhang, Q.; Shi, X.; Wang, Q.; Zhang, L.; et al. Structure of the SARS-CoV-2  
275 Spike Receptor-Binding Domain Bound to the ACE2 Receptor. *Nature*, **2020**, *581* (7807), 215–220.  
276 <https://doi.org/10.1038/s41586-020-2180-5>.
- 277 [13] Shang, J.; Wan, Y.; Luo, C.; Ye, G.; Geng, Q.; Auerbach, A.; Li, F. Cell Entry Mechanisms of SARS-CoV-2. *Proc. Natl. Acad. Sci. U. S. A.*, **2020**, *117* (21), 11727–11734. <https://doi.org/10.1073/pnas.2003138117>.
- 278
- 279 [14] Waman, V. P.; Sen, N.; Varadi, M.; Daina, A.; Wodak, S. J.; Zoete, V.; Velankar, S.; Orengo, C. The Impact of Structural  
280 Bioinformatics Tools and Resources on SARS-CoV-2 Research and Therapeutic Strategies. *Brief. Bioinform.*, **2021**, *22* (2), 742–  
281 768. <https://doi.org/10.1093/bib/bbaa362>.
- 282 [15] Wise, J. Covid-19: The E484K Mutation and the Risks It Poses. *BMJ*, **2021**, *372*, n359. <https://doi.org/10.1136/bmj.n359>.
- 283 [16] Yurkovetskiy, L.; Wang, X.; Pascal, K. E.; Tomkins-Tinch, C.; Nyalile, T. P.; Wang, Y.; Baum, A.; Diehl, W. E.; Dauphin, A.;  
284 Carbone, C.; et al. Structural and Functional Analysis of the D614G SARS-CoV-2 Spike Protein Variant. *Cell*, **2020**, *183* (3).  
285 <https://doi.org/10.1016/j.cell.2020.09.032>.
- 286 [17] Laffebber, C.; De Koning, K.; Kanaar, R.; Lebbink, J. H. Experimental Evidence for Enhanced Receptor Binding by Rapidly  
287 Spreading SARS-CoV-2 Variants. *bioRxiv*, **2021**, 2021.02.22.432357. <https://doi.org/10.1101/2021.02.22.432357>.
- 288 [18] Okada, P.; Buathong, R.; Phuygun, S.; Thanadachakul, T.; Parmen, S.; Wongboot, W.; Waicharoen, S.; Wacharapluesadee, S.;  
289 Uttayamakul, S.; Vachiraphan, A.; et al. Early Transmission Patterns of Coronavirus Disease 2019 (COVID-19) in Travellers from  
290 Wuhan to Thailand, January 2020. *Eurosurveillance*. European Centre for Disease Prevention and Control (ECDC) February 27,  
291 2020. <https://doi.org/10.2807/1560-7917.ES.2020.25.8.2000097>.
- 292 [19] Puenpa, J.; Suwannakarn, K.; Chansaenroj, J.; Nilyanimit, P.; Yorsaeng, R.; Auphimai, C.; Kitphati, R.; Mungaomklang, A.;  
293 Kongklieng, A.; Chirathaworn, C.; et al. Molecular Epidemiology of the First Wave of Severe Acute Respiratory Syndrome  
294 Coronavirus 2 Infection in Thailand in 2020. *Sci. Rep.*, **2020**, *10* (1). <https://doi.org/10.1038/s41598-020-73554-7>.
- 295 [20] Buathong, R.; Chaifoo, W.; Iamsirithawon, S.; Wacharapluesadee, S.; Joyjinda, Y.; Rodpan, A.; Ampoot, W.; Putcharoen, O.;  
296 Paitoonpong, L.; Suwanpimolkul, G.; et al. Multiple Clades of SARS-CoV-2 Were Introduced to Thailand during the First Quarter  
297 of 2020. *Microbiol. Immunol.*, **2021**, 1348-0421.12883. <https://doi.org/10.1111/1348-0421.12883>.
- 298 [21] Joonlasak, K.; Batty, E. M.; Kochakarn, T.; Panthan, B.; Kümpornsin, K.; Jiaranai, P.; Wangwiwatsin, A.; Huang, A.; Kotanan,  
299 N.; Jaru-Ampornpan, P.; et al. Genomic Surveillance of SARS-CoV-2 in Thailand Reveals Mixed Imported Populations, a Local  
300 Lineage Expansion and a Virus with Truncated ORF7a. *Virus Res.*, **2021**, *292*, 198233.  
301 <https://doi.org/10.1016/j.virusres.2020.198233>.
- 302 [22] Hadfield, J.; Megill, C.; Bell, S. M.; Huddleston, J.; Potter, B.; Callender, C.; Sagulenko, P.; Bedford, T.; Neher, R. A. NextStrain:  
303 Real-Time Tracking of Pathogen Evolution. *Bioinformatics*, **2018**, *34* (23), 4121–4123.  
304 <https://doi.org/10.1093/bioinformatics/bty407>.
- 305 [23] Genomic epidemiology of novel coronavirus - Thailand-focused subsampling <https://nextstrain.org/community/fai->

- 306 k/coni/Thailand?branchLabel=aa&c=GISAID\_clade&d=tree&dmax=2021-02-  
307 07&fbclid=IwAR19RF7fisEmajfTO34mlTB7pDPzpvC-adGmXyLYMkdMikA\_yDTVFLvcG5A (accessed Apr 27, 2021).
- 308 [24] Kabsch, W.; Sander, C. Dictionary of Protein Secondary Structure: Pattern Recognition of Hydrogen-bonded and Geometrical  
309 Features. *Biopolymers*, **1983**, 22 (12). <https://doi.org/10.1002/bip.360221211>.
- 310 [25] Rost, B.; Sander, C. Conservation and Prediction of Solvent Accessibility in Protein Families. *Proteins Struct. Funct. Genet.*, **1994**,  
311 20 (3), 216–226.
- 312 [26] Jeffrey, G. A. *An Introduction to Hydrogen Bonding*; Oxford University Press, 1997.
- 313 [27] Bosshard, H. R.; Marti, D. N.; Jelesarov, I. Protein Stabilization by Salt Bridges: Concepts, Experimental Approaches and  
314 Clarification of Some Misunderstandings. *J. Mol. Recognit.*, **2004**, 17 (1), 1–16. <https://doi.org/10.1002/jmr.657>.
- 315 [28] Ittisoponpisan, S.; Islam, S. A.; Khanna, T.; Alhuzimi, E.; David, A.; Sternberg, M. J. E. Can Predicted Protein 3D Structures  
316 Provide Reliable Insights into Whether Missense Variants Are Disease Associated? *J. Mol. Biol.*, **2019**, 431 (11), 2197–2212.  
317 <https://doi.org/10.1016/j.jmb.2019.04.009>.
- 318 [29] Peter, A. S.; Roth, E.; Schulz, S. R.; Fraedrich, K.; Steinmetz, T.; Damm, D.; Hauke, M.; Richel, E.; Mueller-Schmucker, S.;  
319 Habenicht, K.; et al. A Pair of Non-Competing Neutralizing Human Monoclonal Antibodies Protecting from Disease in a SARS-  
320 CoV-2 Infection Model. *bioRxiv*, **2021**, 2021.04.16.440101. <https://doi.org/10.1101/2021.04.16.440101>.
- 321 [30] Walls, A. C.; Park, Y. J.; Tortorici, M. A.; Wall, A.; McGuire, A. T.; Veesler, D. Structure, Function, and Antigenicity of the  
322 SARS-CoV-2 Spike Glycoprotein. *Cell*, **2020**, 181 (2). <https://doi.org/10.1016/j.cell.2020.02.058>.
- 323 [31] Volz, E.; Hill, V.; McCrone, J. T.; Price, A.; Jorgensen, D.; O'Toole, Á.; Southgate, J.; Johnson, R.; Jackson, B.; Nascimento, F.  
324 F.; et al. Evaluating the Effects of SARS-CoV-2 Spike Mutation D614G on Transmissibility and Pathogenicity. *Cell*, **2021**, 184  
325 (1). <https://doi.org/10.1016/j.cell.2020.11.020>.
- 326 [32] Nyunt, M. H.; Soe, H. O.; Aye, K. T.; Aung, W. W.; Kyaw, Y. Y.; Kyaw, A. K.; Myat, T. W.; Latt, A. Z.; Win, M. M.; Win, A.  
327 A.; et al. Surge of Severe Acute Respiratory Syndrome Coronavirus 2 Infections Linked to Single Introduction of a Virus Strain in  
328 Myanmar, 2020. *Sci. Rep.*, **2021**, 11 (1), 1–6. <https://doi.org/10.1038/s41598-021-89361-7>.
- 329 [33] Mat Yassim, A. S.; Asras, M. F. F.; Gazali, A. M.; Marcial-Coba, M. S.; Zainulabid, U. A.; Ahmad, H. F. COVID-19 Outbreak in  
330 Malaysia: Decoding D614G Mutation of SARS-CoV-2 Virus Isolated from an Asymptomatic Case in Pahang. *Mater. Today*  
331 *Proc.*, **2021**. <https://doi.org/10.1016/j.matpr.2021.02.387>.
- 332 [34] Li, Q.; Wu, J.; Nie, J.; Li, X.; Huang, W.; Correspondence, Y. W.; Zhang, L.; Hao, H.; Liu, S.; Zhao, C.; et al. The Impact of  
333 Mutations in SARS-CoV-2 Spike on Viral Infectivity and Antigenicity. **2020**. <https://doi.org/10.1016/j.cell.2020.07.012>.
- 334 [35] Shang, J.; Ye, G.; Shi, K.; Wan, Y.; Luo, C.; Aihara, H.; Geng, Q.; Auerbach, A.; Li, F. Structural Basis of Receptor Recognition  
335 by SARS-CoV-2. *Nature*, **2020**, 581 (7807), 221–224. <https://doi.org/10.1038/s41586-020-2179-y>.
- 336 [36] Liu, Y.; Liu, J.; Plante, K. S.; Plante, J. A.; Xie, X.; Zhang, X.; Ku, Z.; An, Z.; Scharton, D.; Schindewolf, C.; et al. The N501Y  
337 Spike Substitution Enhances SARS-CoV-2 Transmission. *bioRxiv*, **2021**, 2021.03.08.434499.  
338 <https://doi.org/10.1101/2021.03.08.434499>.
- 339 [37] Shahhosseini, N.; Babuadze, G. (Giorgi); Wong, G.; Kobinger, G. P. Mutation Signatures and In Silico Docking of Novel SARS-  
340 CoV-2 Variants of Concern. *Microorganisms*, **2021**, 9 (5), 926. <https://doi.org/10.3390/microorganisms9050926>.
- 341 [38] Department of Disease Control. Thailand situation update on 19 December 2020  
342 <https://ddc.moph.go.th/viralpneumonia/eng/file/situation/situation-no349-191263.pdf> (accessed Jul 16, 2021).
- 343 [39] Department of Disease Control. Thailand situation update on 24 December 2020  
344 <https://ddc.moph.go.th/viralpneumonia/eng/file/situation/situation-no350-241263.pdf> (accessed Jul 16, 2021).
- 345 [40] Korber, B.; Fischer, W. M.; Gnanakaran, S.; Yoon, H.; Theiler, J.; Abfalterer, W.; Hengartner, N.; Giorgi, E. E.; Bhattacharya, T.;  
346 Foley, B.; et al. Tracking Changes in SARS-CoV-2 Spike: Evidence That D614G Increases Infectivity of the COVID-19 Virus.  
347 *Cell*, **2020**, 182 (4). <https://doi.org/10.1016/j.cell.2020.06.043>.
- 348 [41] Huang, Y.; Yang, C.; Xu, X. feng; Xu, W.; Liu, S. wen. Structural and Functional Properties of SARS-CoV-2 Spike Protein:  
349 Potential Antivirus Drug Development for COVID-19. *Acta Pharmacologica Sinica*. Springer Nature September 1, 2020, pp  
350 1141–1149. <https://doi.org/10.1038/s41401-020-0485-4>.
- 351 [42] Zhang, L.; Guo, H. Biomarkers of COVID-19 and Technologies to Combat SARS-CoV-2. *Adv. Biomark. Sci. Technol.*, **2020**, 2,  
352 1–23. <https://doi.org/10.1016/j.abst.2020.08.001>.
- 353 [43] Xia, S.; Liu, M.; Wang, C.; Xu, W.; Lan, Q.; Feng, S.; Qi, F.; Bao, L.; Du, L.; Liu, S.; et al. Inhibition of SARS-CoV-2  
354 (Previously 2019-NCoV) Infection by a Highly Potent Pan-Coronavirus Fusion Inhibitor Targeting Its Spike Protein That Harbors

- 355 a High Capacity to Mediate Membrane Fusion. *Cell Res.*, **2020**, *30* (4), 343–355. <https://doi.org/10.1038/s41422-020-0305-x>.
- 356 [44] Sanjuán, R.; Nebot, M. R.; Chirico, N.; Mansky, L. M.; Belshaw, R. Viral Mutation Rates. *J. Virol.*, **2010**, *84* (19), 9733–9748.  
357 <https://doi.org/10.1128/jvi.00694-10>.
- 358 [45] David A Steinhauer, Holland, J. J. Rapid Evolution of RNA Viruses. *Annu. Rev. Microbiol.*, **1987**, *41* (1), 409–431.  
359 <https://doi.org/10.1146/annurev.mi.41.100187.002205>.
- 360 [46] Amraie, R.; Napoleon, M. A.; Yin, W.; Berrigan, J.; Suder, E.; Zhao, G.; Olejnik, J.; Gummuluru, S.; Muhlberger, E.; Chitalia, V.;  
361 et al. CD209L/L-SIGN and CD209/DC-SIGN Act as Receptors for SARS-CoV-2 and Are Differentially Expressed in Lung and  
362 Kidney Epithelial and Endothelial Cells. *bioRxiv*. bioRxiv June 23, 2020. <https://doi.org/10.1101/2020.06.22.165803>.
- 363 [47] Kane, L. Review 1: "KIM-1/TIM-1 Is a Receptor for SARS-CoV-2 in Lung and Kidney" License: Creative Commons Attribution  
364 4.0 International License (CC-BY 4.0). *Rapid Rev. COVID-19*, **2020**. <https://doi.org/10.1162/2e3983f5.919b71a6>.
- 365 [48] Cantuti-Castelvetri, L.; Ojha, R.; Pedro, L. D.; Djannatian, M.; Franz, J.; Kuivanen, S.; van der Meer, F.; Kallio, K.; Kaya, T.;  
366 Anastasina, M.; et al. Neuropilin-1 Facilitates SARS-CoV-2 Cell Entry and Infectivity. *Science (80-. )*, **2020**, *370* (6518), 856–  
367 860. <https://doi.org/10.1126/science.abd2985>.
- 368 [49] Daly, J. L.; Simonetti, B.; Klein, K.; Chen, K. E.; Williamson, M. K.; Antón-Plágaro, C.; Shoemark, D. K.; Simón-Gracia, L.;  
369 Bauer, M.; Hollandi, R.; et al. Neuropilin-1 Is a Host Factor for SARS-CoV-2 Infection. *Science (80-. )*, **2020**, *370* (6518), 861–  
370 865. <https://doi.org/10.1126/science.abd3072>.
- 371 [50] Lam, S. D.; Bordin, N.; Waman, V. P.; Scholes, H. M.; Ashford, P.; Sen, N.; van Dorp, L.; Rauer, C.; Dawson, N. L.; Pang, C. S.  
372 M.; et al. SARS-CoV-2 Spike Protein Predicted to Form Complexes with Host Receptor Protein Orthologues from a Broad Range  
373 of Mammals. *Sci. Rep.*, **2020**, *10* (1), 16471. <https://doi.org/10.1038/s41598-020-71936-5>.
- 374 [51] David, A.; Razali, R.; Wass, M. N.; Sternberg, M. J. E. Protein-Protein Interaction Sites Are Hot Spots for Disease-Associated  
375 Nonsynonymous SNPs. *Hum. Mutat.*, **2012**, *33* (2), 359–363. <https://doi.org/10.1002/humu.21656>.
- 376 [52] David, A.; Sternberg, M. J. E. The Contribution of Missense Mutations in Core and Rim Residues of Protein-Protein Interfaces to  
377 Human Disease. *J. Mol. Biol.*, **2015**, *427* (17), 2886–2898. <https://doi.org/10.1016/j.jmb.2015.07.004>.
- 378 [53] Jubb, H. C.; Pandurangan, A. P.; Turner, M. A.; Ochoa-Montaño, B.; Blundell, T. L.; Ascher, D. B. Mutations at Protein-Protein  
379 Interfaces: Small Changes over Big Surfaces Have Large Impacts on Human Health. *Progress in Biophysics and Molecular*  
380 *Biology*. Elsevier Ltd September 2017, pp 3–13. <https://doi.org/10.1016/j.pbiomolbio.2016.10.002>.
- 381
- 382
- 383



384 **Table**

385

386 **Table 1: Analysis of six variants found specifically in Thailand.**

| <b>Variant</b> | <b>Freq. (%)</b> | <b>GISAID Clade</b> | <b>Location on Spike Protein</b> | <b>Structural consequences</b>                                                                                    |
|----------------|------------------|---------------------|----------------------------------|-------------------------------------------------------------------------------------------------------------------|
| p.T51N         | 0.17             | GH                  | surface                          | H-bond formed between Asn51 - His49 (no damage)                                                                   |
| p.P57T         | 0.17             | GH                  | buried                           | H-bond formed between Thr57- Gln271 (no damage)                                                                   |
| p.I68R         | 0.34             | O                   | surface                          | No structural damage detected                                                                                     |
| p.S205T        | 0.17             | S                   | surface                          | H-bond formed between Thr205-Glu191<br>Cavity contraction > 70 Å <sup>3</sup> , <b>Structural damage detected</b> |
| p.K278T        | 0.17             | GH                  | surface                          | H-bond formed between Thr278-Thr286 (no damage)                                                                   |
| p.G832C        | 0.34             | G                   | interface                        | No structural damage detected                                                                                     |

387

388

389



## 390 **Figures**

391

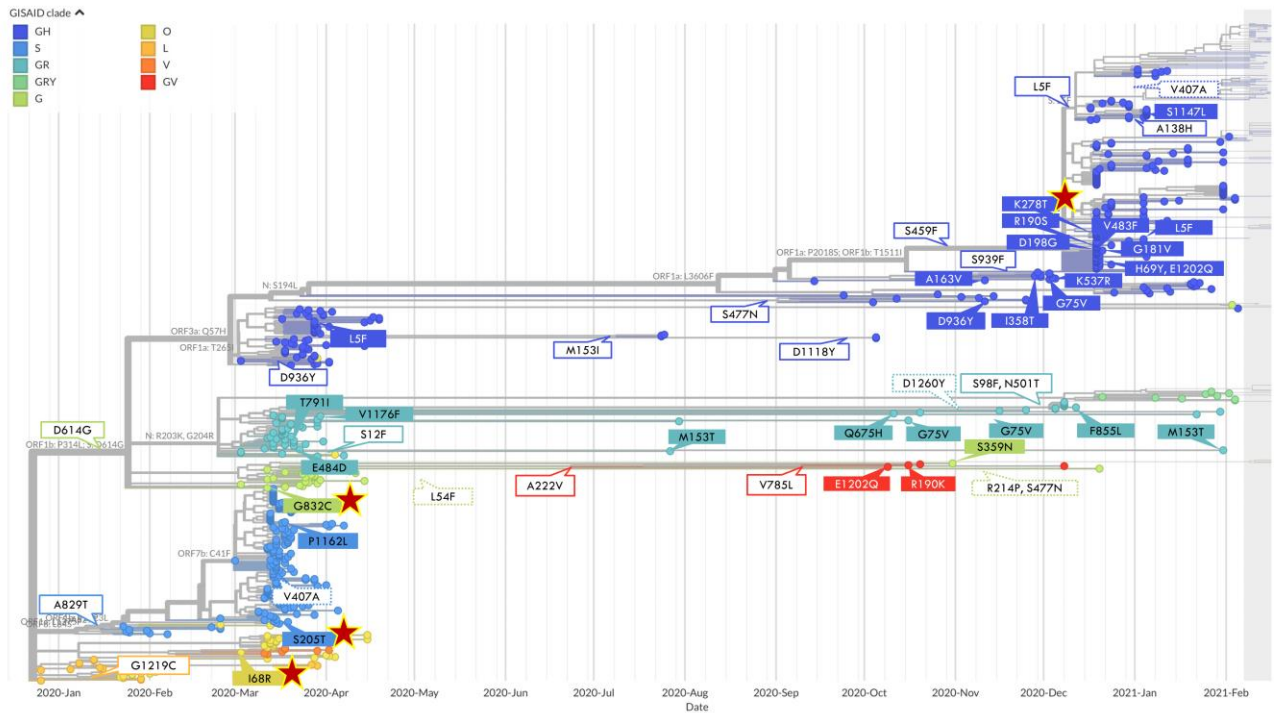

392

393 **Figure 1: Phylogenetic analysis of SARS-CoV-2 strains collected in Thailand from December 2019 to**

394 **February 2021.** In the phylogenetic tree, each node represents a strain. White boxes with colour borders

395 represent branches where variants evolved and are shared among descendants. Colour boxes indicate newly

396 evolved variants found on each particular leaf node. Variants that cannot be mapped directly onto this tree due to

397 incomplete strain information are estimated and represented as white boxes with dotted borders. Variants that

398 were unique to Thai strains are indicated by the red asterisk (★).

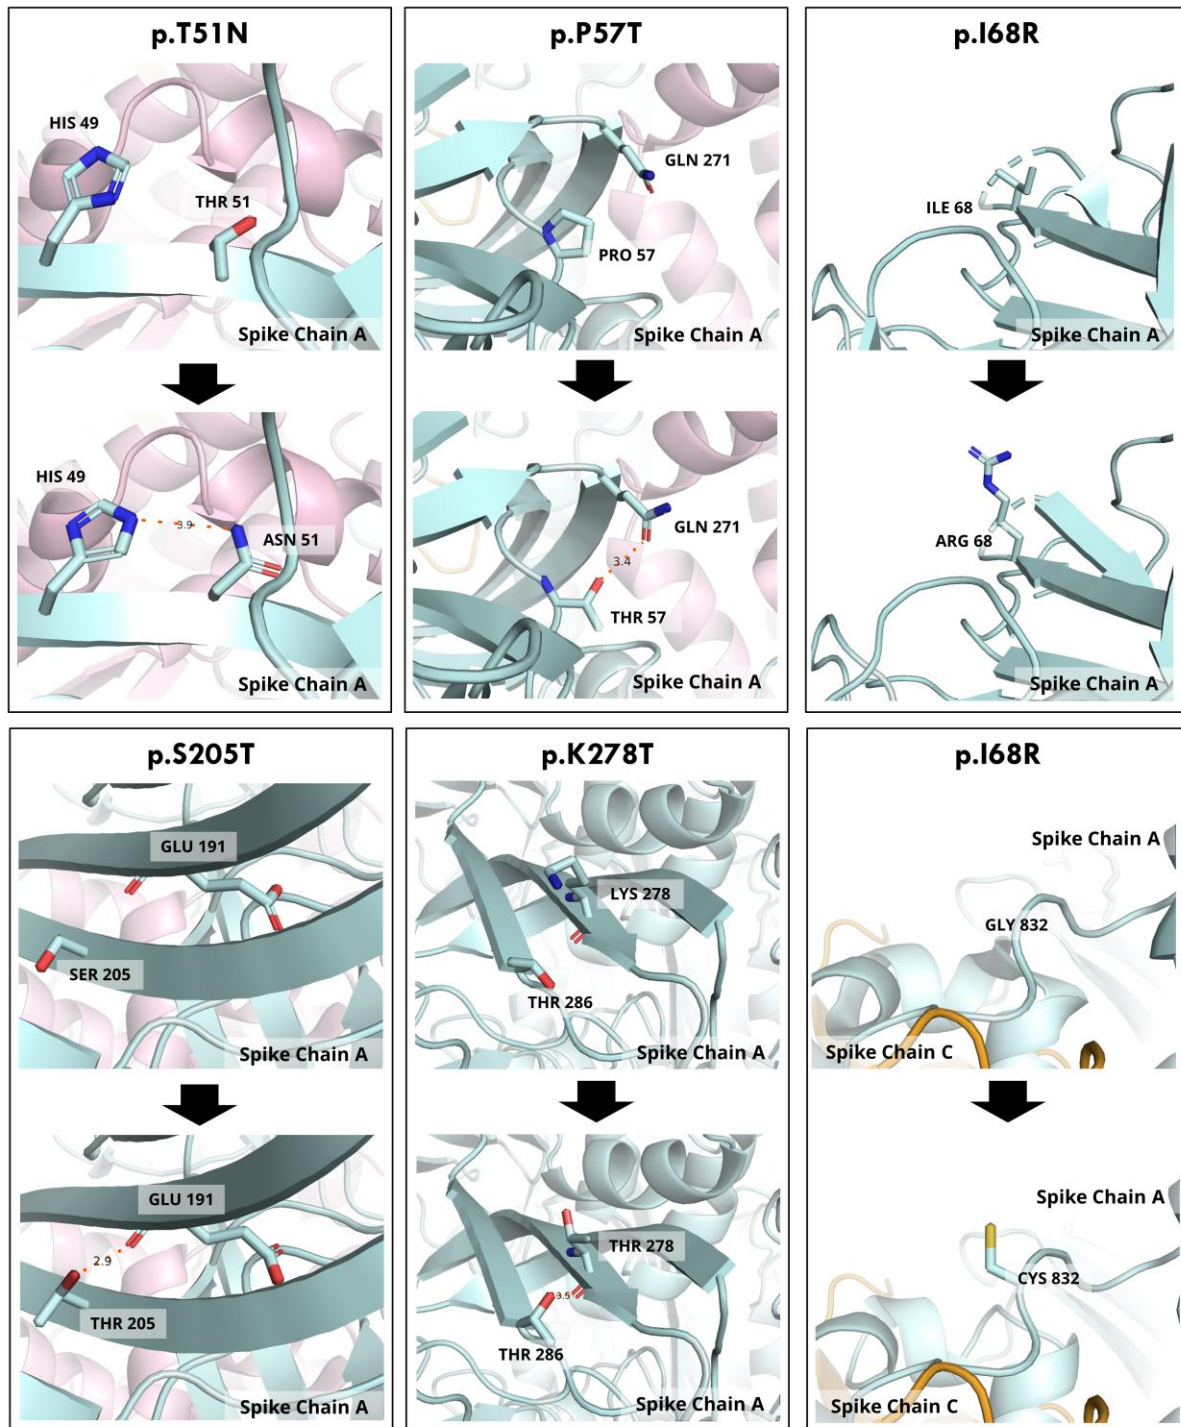

399

400 **Figure 2: Structural analysis of Thai unique variants.** In each panel, the wild type structure is presented on  
401 top and the predicted mutant on the bottom. The PDB structure used in this analysis was 6XR8. Chain A, B, and  
402 C are represented in pale blue, light pink, and yellow, respectively. All variants were simulated on Chain A. H-  
403 bonds are shown as orange dashed lines.

404

GISAI clade ^

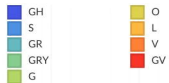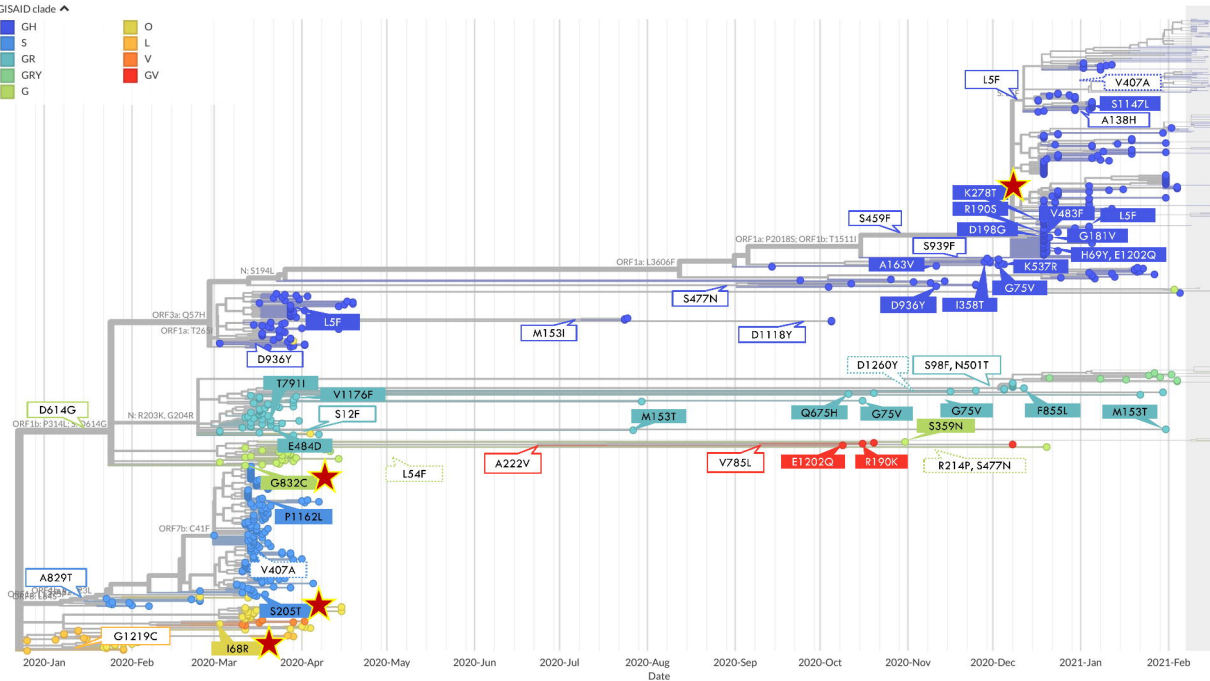

### p.T51N

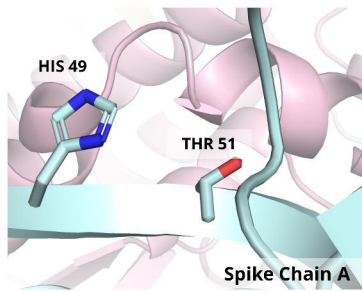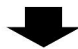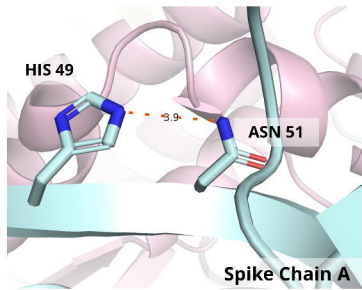

### p.P57T

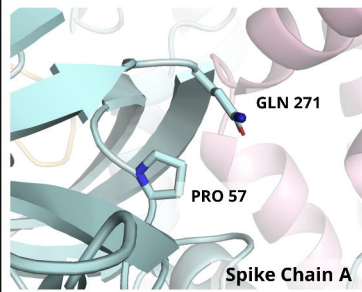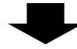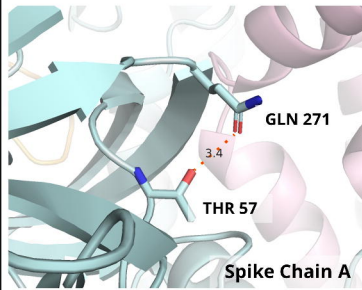

### p.I68R

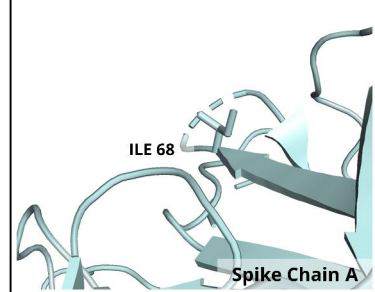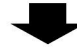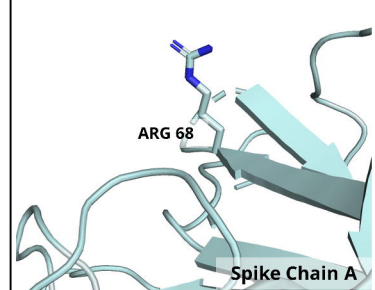

### p.S205T

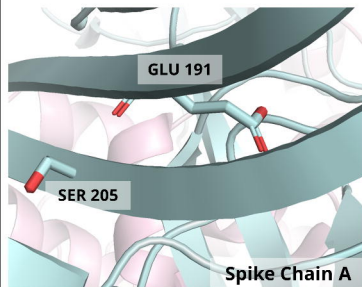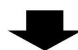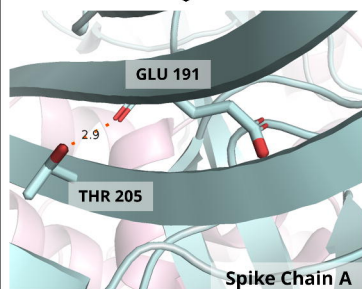

### p.K278T

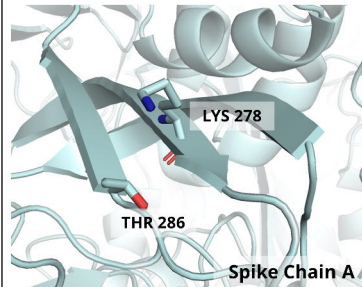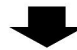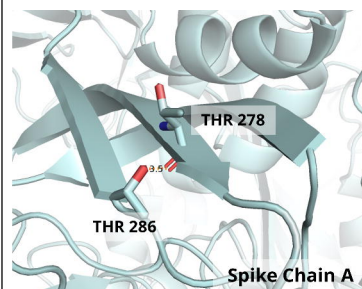

### p.I68R

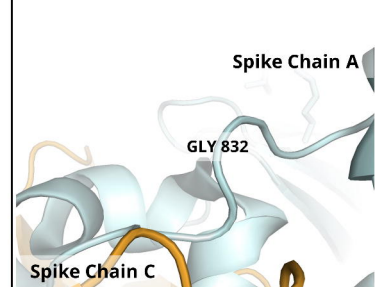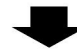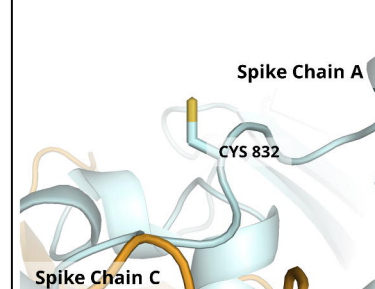

Source: https://www.biorxiv.org/content/10.1101/2022.01.01.474713v1.full.pdf
